# Supplementary material
Source: HighWire-hosted journal article supplement (https://jnm.snmjournals.org/highwire/filestream/93914/field_highwire_adjunct_files/0/Supplemental_Figure_1_JNM_44669_Klein.pdf)

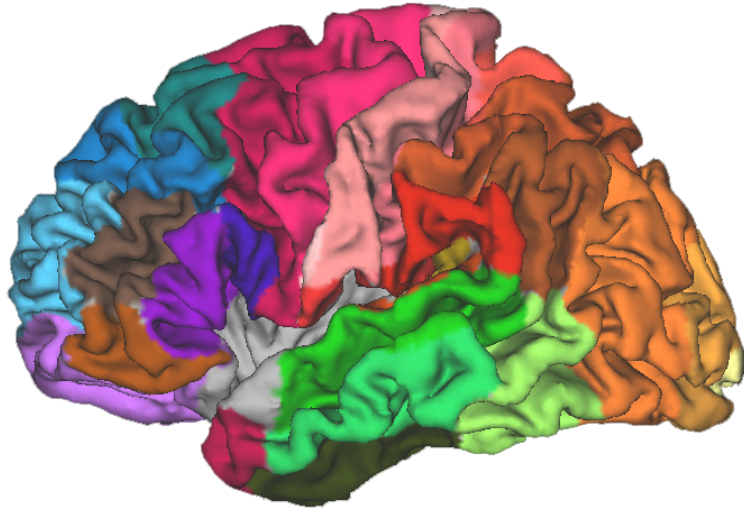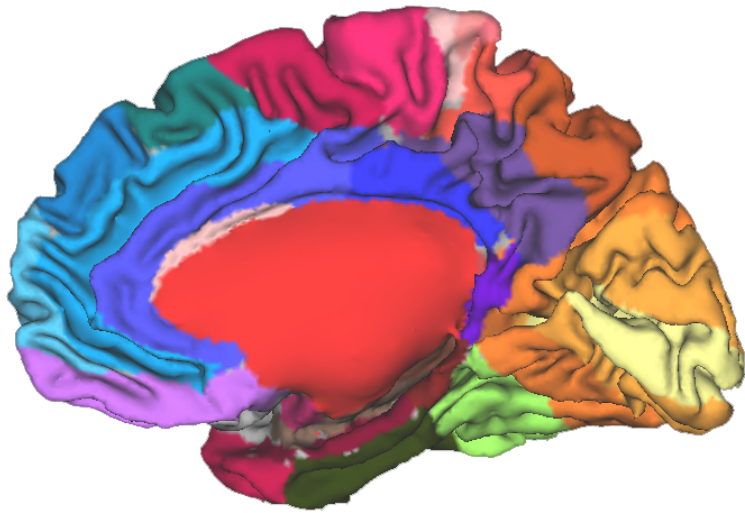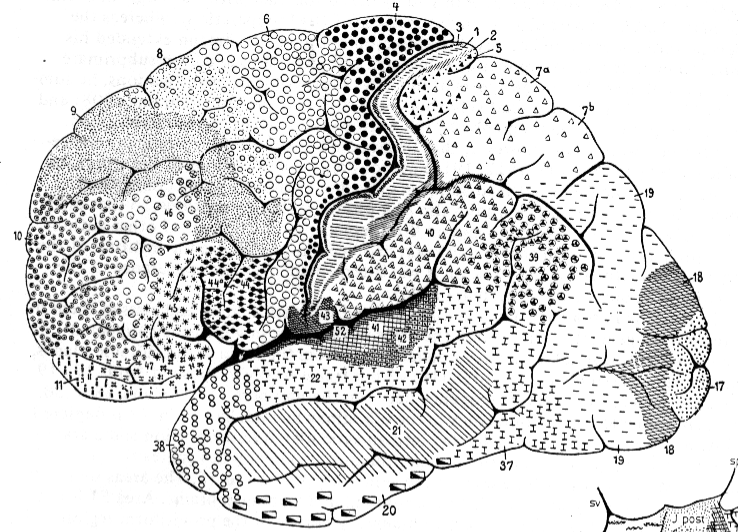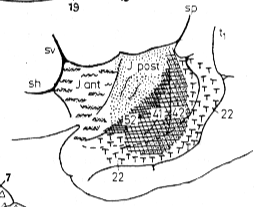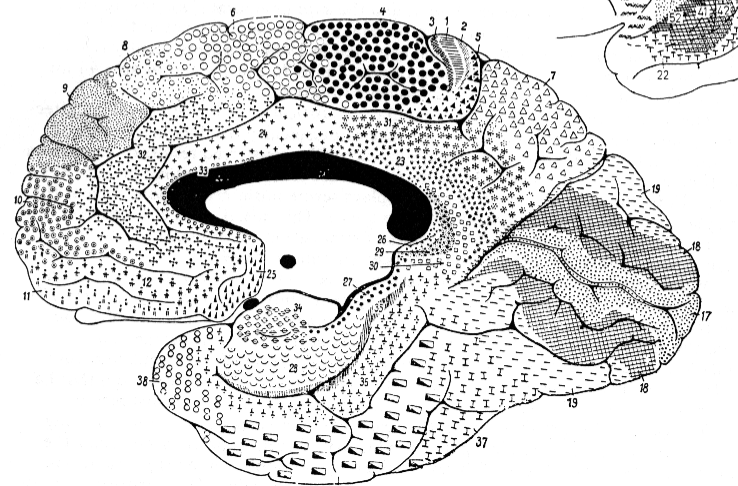

Supplement: Supplemental_Figure_1_JNM_44669_Klein.pdf [file Supplemental_Figure_1_JNM_44669_Klein.pdf]
